# Supplementary material for: Accessing the usefulness of atomic adsorption configurations in predicting the adsorption properties of molecules with machine learning
Source: Royal Society of Chemistry journal article supplement (doi:10.1039/d3cp06312g), 2024-01-01
Supplement: d3cp06312g1.pdf [file d3cp06312g1.pdf]

## Accessing the Usefulness of Atomic Adsorption Configurations in Predicting the Adsorption Properties of Molecules with Machine Learning

Walter Malone\*, Johnathan van der Hyde†, Abdelkader Kara†

\*Department of Physics, Tuskegee University, 1200 W. Montgomery Rd. Tuskegee, AL 36088

†Department of Physics, University of Central Florida, 4000 Central Florida Blvd. Orlando, Florida, 32816

### Supplementary Information

| Number of $XH_n$ Configurations in Training/Validation Dataset | 0    | 10   | 50   | 250  | 500  | 750  | 1250 | Maximum |
|----------------------------------------------------------------|------|------|------|------|------|------|------|---------|
| NH Only                                                        |      |      |      | 0.73 | 0.55 | 0.49 | 0.60 | 0.27    |
| N + H + NH                                                     | 0.76 | 0.5  | 0.46 | 0.33 | 0.28 | 0.25 | 0.23 |         |
| X2                                                             |      |      |      | 0.34 | 0.25 | 0.25 | 0.23 |         |
| X5                                                             |      |      |      | 0.32 | 0.25 | 0.25 | 0.20 |         |
| <b>OH Only</b>                                                 |      |      |      |      |      |      |      |         |
| OH Only                                                        |      |      |      | 0.50 | 0.41 | 0.46 | 0.33 | 0.22    |
| O + H + OH                                                     | 0.52 | 0.58 | 0.43 | 0.30 | 0.30 | 0.27 | 0.22 |         |
| X2                                                             |      |      |      | 0.31 | 0.27 | 0.25 | 0.19 |         |
| X5                                                             |      |      |      | 0.30 | 0.27 | 0.24 | 0.19 |         |
| <b>H<sub>2</sub>O Only</b>                                     |      |      |      |      |      |      |      |         |
| H <sub>2</sub> O Only                                          |      |      |      | 0.11 | 0.09 | 0.10 | 0.08 | 0.07    |
| O + H + H <sub>2</sub> O                                       | 0.3  | 0.3  | 0.21 | 0.14 | 0.12 | 0.11 | 0.08 |         |
| X2                                                             |      |      |      | 0.15 | 0.13 | 0.11 | 0.09 |         |
| X5                                                             |      |      |      | 0.14 | 0.10 | 0.09 | 0.07 |         |
| <b>CH Only</b>                                                 |      |      |      |      |      |      |      |         |
| CH Only                                                        |      |      |      | 0.70 | 0.62 | 0.54 | 0.35 | 0.21    |
| C + H + CH                                                     | 9.16 | 0.65 | 0.51 | 0.36 | 0.35 | 0.32 | 0.24 |         |
| X2                                                             |      |      |      | 0.36 | 0.32 | 0.29 | 0.24 |         |
| X5                                                             |      |      |      | 0.36 | 0.29 | 0.30 | 0.22 |         |
| <b>CH<sub>2</sub> Only</b>                                     |      |      |      |      |      |      |      |         |
| CH <sub>2</sub> Only                                           |      |      |      | 0.48 | 0.41 | 0.37 | 0.41 | 0.25    |
| C + H + CH <sub>2</sub>                                        | 3.24 | 3.04 | 0.61 | 0.40 | 0.30 | 0.26 | 0.29 |         |
| X2                                                             |      |      |      | 0.37 | 0.27 | 0.24 | 0.25 |         |
| X5                                                             |      |      |      | 0.34 | 0.27 | 0.23 | 0.24 |         |
| <b>CH<sub>3</sub> Only</b>                                     |      |      |      |      |      |      |      |         |
| CH <sub>3</sub> Only                                           |      |      |      | 0.34 | 0.32 | 0.31 | 0.31 | 0.16    |
| C + H + CH <sub>3</sub>                                        | 5.81 | 1.13 | 0.75 | 0.37 | 0.25 | 0.23 | 0.22 |         |
| X2                                                             |      |      |      | 0.32 | 0.22 | 0.24 | 0.18 |         |

|    |  |  |  |      |      |      |      |  |
|----|--|--|--|------|------|------|------|--|
| X5 |  |  |  | 0.27 | 0.23 | 0.19 | 0.17 |  |
|----|--|--|--|------|------|------|------|--|

**TABLE S1:** MAE for HIP-NN models trained with 0, 10, 50, 250, 500, 750, and 1250  $XH_n$  configurations in the training and validation dataset. Rows, in order, are models with  $XH_n$  configurations only in the training and validation dataset, models with X, H, and  $XH_n$  configurations in the training and validation dataset, and models with X, H, and  $XH_n$  configurations in the training and validation dataset with  $XH_n$  configurations weighted twofold and fivefold.

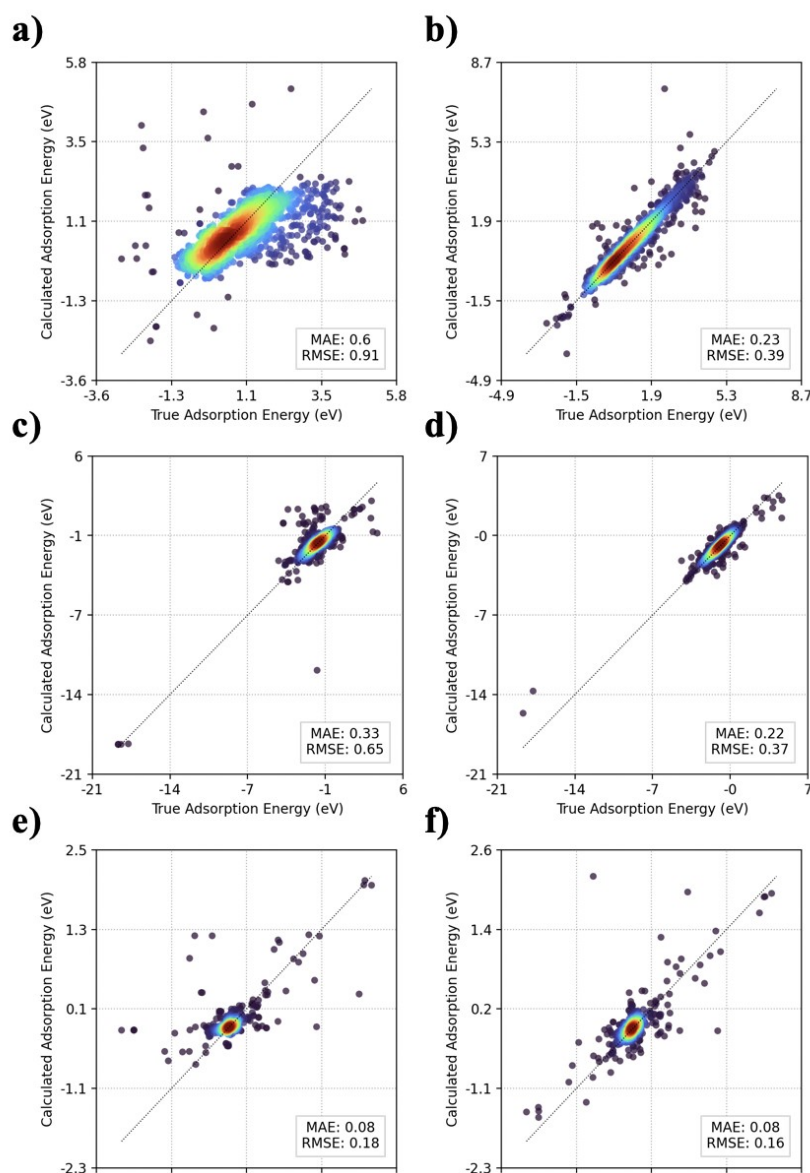

**FIGURE S1:** Calculated adsorption energy vs true adsorption energy with 1250  $XH_n$  configurations in the training and validation dataset for a) NH without and b) with N and H adsorption configurations in the training and validation dataset, c) OH without and d) with O and H adsorption configurations in the training and validation dataset, and e) H<sub>2</sub>O without and f) with O and H adsorption configurations in the training and validation dataset.
